# Supplementary material for: The challenges, achievements and applications of submersible superhydrophobic materials
Source: Royal Society of Chemistry journal article supplement (doi:10.1039/d0cs01056a), 2021-01-01
Supplement: d0cs01056a1.pdf [file d0cs01056a1.pdf]

Supplementary Material for

**The Challenges, Achievements and Applications of Submersible Superhydrophobic Materials**

Yasmin A. Mehanna, Emma Sadler, Rebekah L. Upton, Andrew G. Kempchinsky, Yao Lu, and Colin R. Crick\*

| No. | Reference                               | Surface Composition/texture                                                  | Stable for | Tested depth |
|-----|-----------------------------------------|------------------------------------------------------------------------------|------------|--------------|
| 1   | Martinez-Gomez et al. <sup>1</sup> 2017 | Sprayed hybrid organic-inorganic silica-based particles                      | 6 months   | 2 cm         |
| 2   | Xu et al. <sup>2</sup> 2014             | A trench (1mm*46µm*85µm)                                                     | 50 days    | 16.5 cm      |
| 3   | Röhrig et al. <sup>3</sup> 2014         | Nanofur (non-pressurized) made of polycarbonate                              | 31 days    | 4 mm         |
| 4   | Lee et al. <sup>4</sup> 2012            | W <sub>18</sub> O <sub>49</sub> nanowire arrayed superhydrophobic structures | ~ 9 days   | 5 cm         |

**Table S1:** Surfaces with the longest-reported air-layer stability time.

| No. | Reference                          | Surface Composition/texture                                          | Max. tolerated Pressure | Equivalent immersion depth | Additional factors tested            |
|-----|------------------------------------|----------------------------------------------------------------------|-------------------------|----------------------------|--------------------------------------|
| 1   | Vüllers et al. <sup>5</sup> 2018   | Pressurized nanofur made of polycarbonate                            | 4 bar                   | 40 m                       | -                                    |
| 2   | Li et al. <sup>6</sup> 2019        | Porous superhydrophobic Ti surfaces                                  | 3.5 bar                 | 35 m                       | -                                    |
| 3   | Xiang et al. <sup>7</sup> 2017     | Lotus leaves immersed under air-saturated water                      | 1.5 bar                 | 15 m                       | Flow rate of 23 mL/min               |
| 4   | Deka et al. <sup>8</sup> 2019      | Electrosprayed aerogel/PDMS/PVDF over electrospun PVDF-HFP membrane  | ~1.3 bar                | 13 m                       | Saline conditions (up to 0.5 mM SDS) |
| 5   | Domingues et al. <sup>9</sup> 2018 | doubly reentrant cavities (DRCs) made of SiO <sub>2</sub> /Si wafers | 1-1.2 bar               | 10-12 m                    | -                                    |
| 6   | Vüllers et al. <sup>5</sup> 2018   | Nanofur (non-pressurized) made of polycarbonate                      | 0.9 bar                 | 9 m                        | -                                    |

**Table S2:** Surfaces with the highest-reported maximum tolerated pressure. Here, the pressure for which failure in air-layer starts is considered.

## References:

- 1 A. Aránzazu Martínez-Gómezgómez, S. Lópezlópez, T. García, R. De Francisco, P. Tiemblo and N. García, *ACS Omega*, 2017, **2**, 8928–8939.
- 2 M. Xu, G. Sun and C. J. Kim, *Phys. Rev. Lett.*, 2014, **113**, 1–5.
- 3 M. Röhrig, M. Mail, M. Schneider, H. Louvin, A. Hopf, T. Schimmel, M. Worgull and H. Hölscher, *Adv. Mater. Interfaces*, 2014, **1**, 1–10.
- 4 J. Lee and K. Yong, *J. Mater. Chem.*, 2012, **22**, 20250–20256.
- 5 F. Vüllers, Y. Germain, L. M. Petit, H. Hölscher and M. N. Kavalenka, *Adv. Mater. Interfaces*, 2018, **5**, 1–8.
- 6 Z. Li, J. Marlena, D. Pranantyo, B. L. Nguyen and C. H. Yap, *J. Mater. Chem. A*, 2019, **7**, 16387–16396.
- 7 Y. Xiang, S. Huang, P. Lv, Y. Xue, Q. Su and H. Duan, *Phys. Rev. Lett.*, 2017, **119**, 1–5.
- 8 B. J. Deka, E. J. Lee, J. Guo, J. Kharraz and A. K. An, *Environ. Sci. Technol.*, 2019, **53**, 4948–4958.
- 9 E. M. Domingues, S. Arunachalam, J. Nauruzbayeva and H. Mishra, *Nat. Commun.*, 2018, **9**, 1–11.
